# Supplementary material
Source: Springer Nature journal article supplement (https://www.springermedizin.de/resource/supplementary/12943_2013_1220_MOESM5_ESM.pdf/9552346)

**A**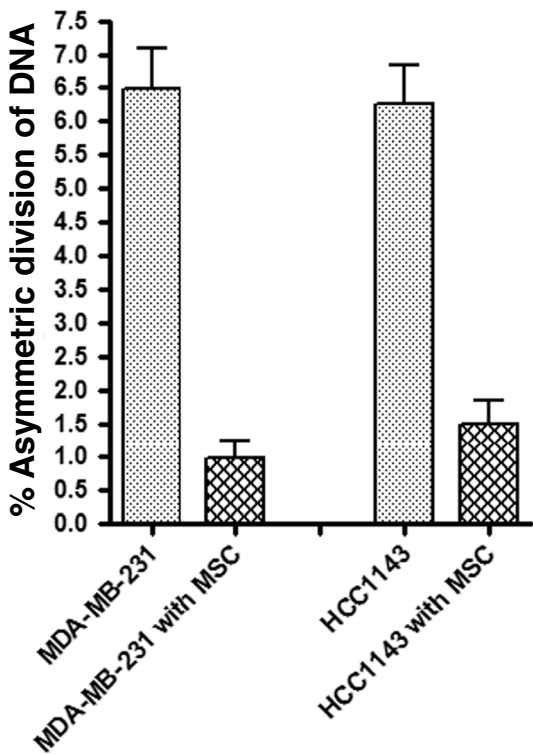**B**

| Cell line  | % CD44 <sup>+</sup> /CD24 <sup>-</sup> |       |
|------------|----------------------------------------|-------|
|            | no MSC                                 | MSC   |
| MDA-MB-231 | 99.93                                  | 98.66 |
| HCC1143    | 16.38                                  | 81.97 |
| T47D       | 0                                      | 57.32 |

Supplement: MOESM5 [file 9552346]
